# Supplementary material for: Familial globular glial tauopathy linked to MAPT mutations: molecular neuropathology and seeding capacity of a prototypical mixed neuronal and glial tauopathy
Source: PubMed Central journal article supplement (PMC7096369; doi:10.1007/s00401-019-02122-9), 2020-01-06

Supplementary Figure 6

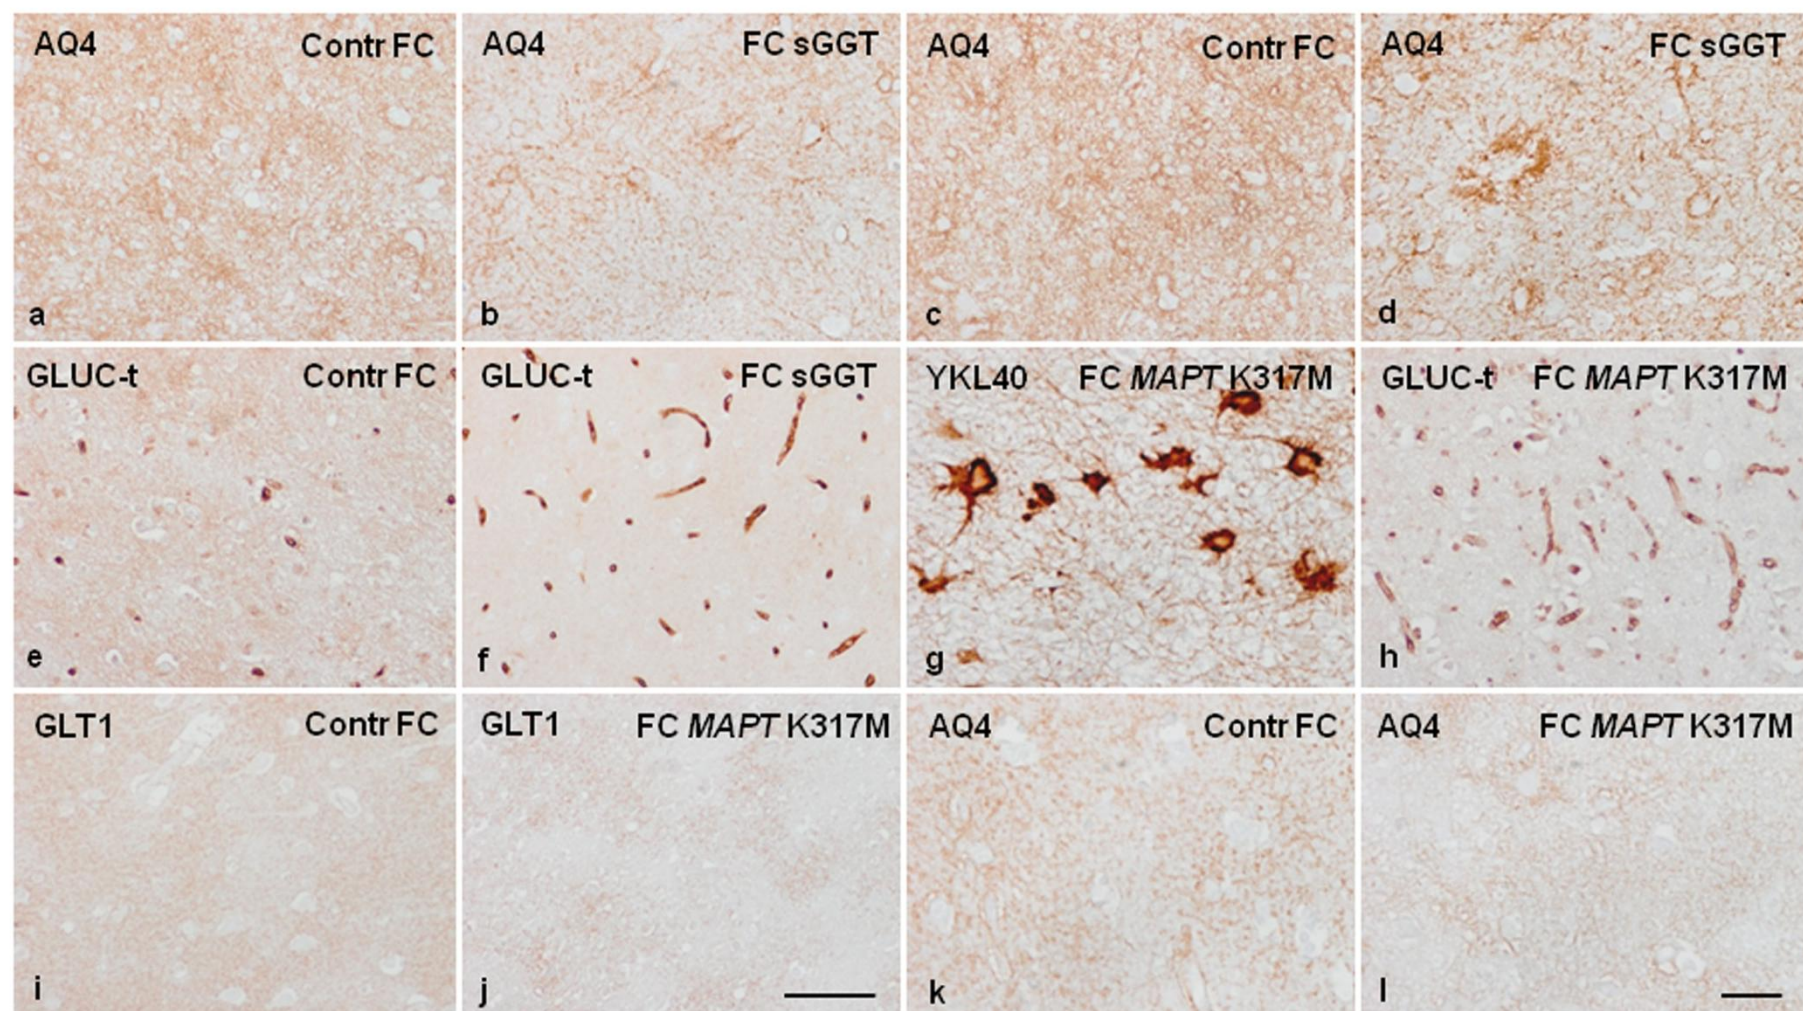

Supplement: 401_2019_2122_MOESM8_ESM.pdf [file 401_2019_2122_MOESM8_ESM.pdf]
