# Supplementary material for: Familial globular glial tauopathy linked to MAPT mutations: molecular neuropathology and seeding capacity of a prototypical mixed neuronal and glial tauopathy
Source: Springer Nature journal article supplement (doi:10.1007/s00401-019-02122-9), 2020-01-06

Supplementary Figure 1

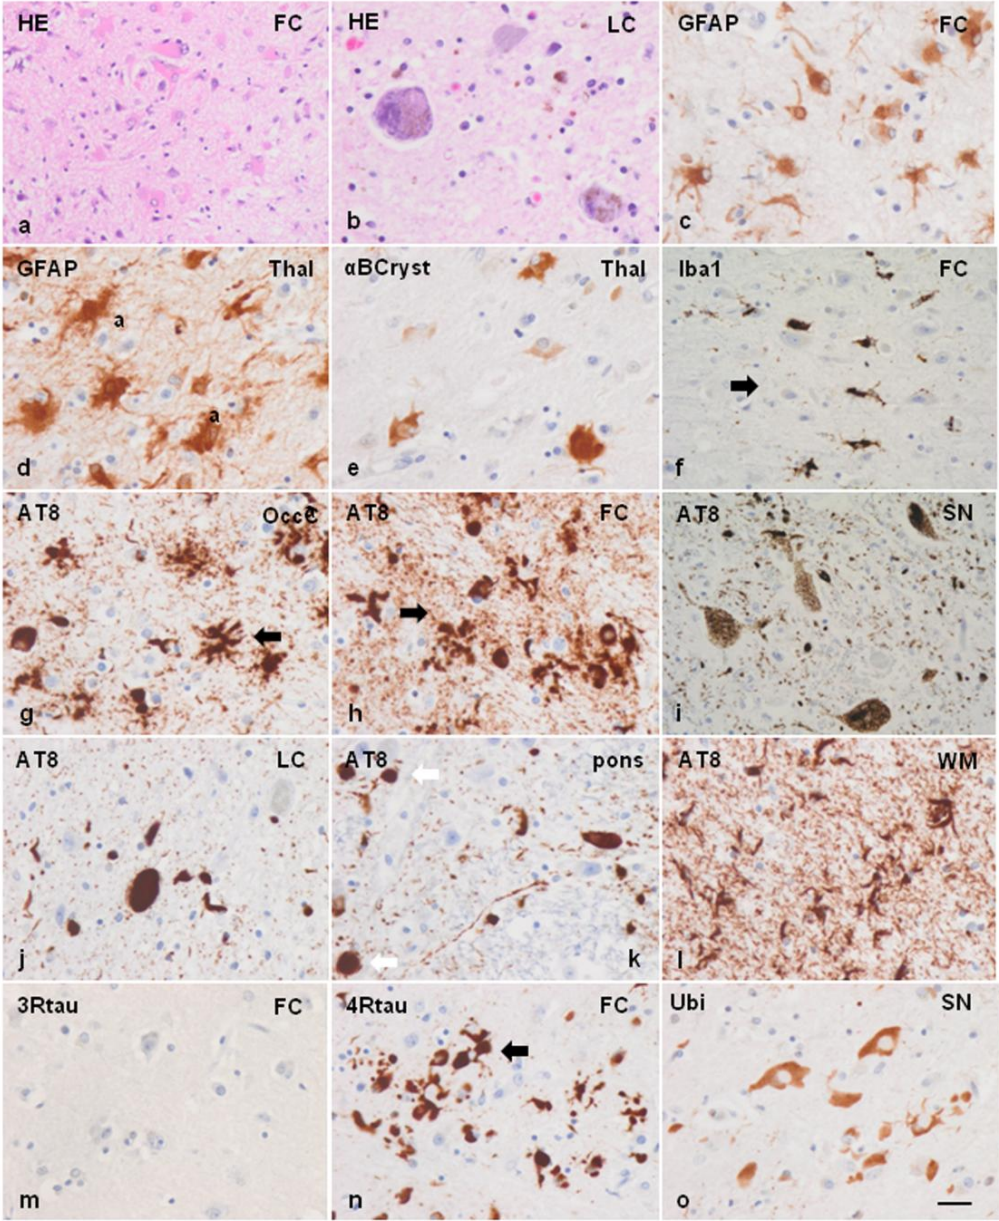

Supplement: MOESM1 [file 17672314]
